# Supplementary material
Source: Springer Nature journal article supplement (https://www.springermedizin.de/resource/supplementary/12916_2013_981_MOESM21_ESM.pdf/9598756)

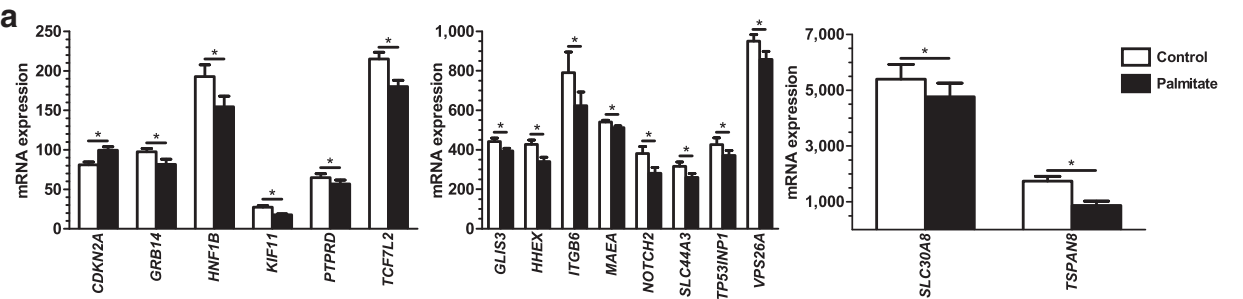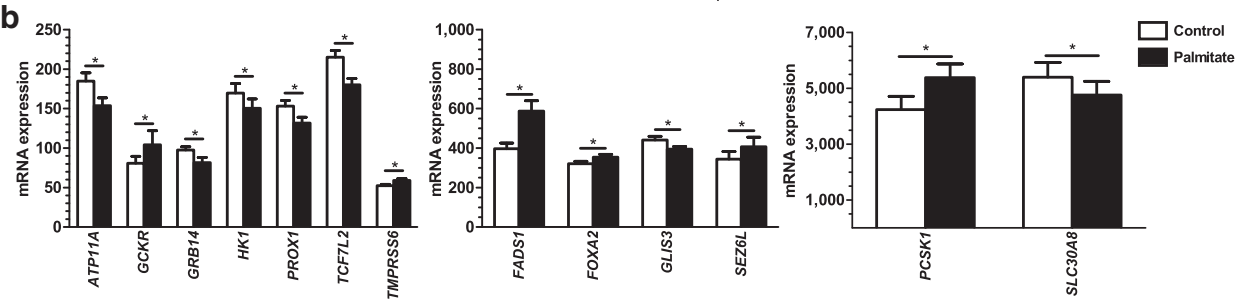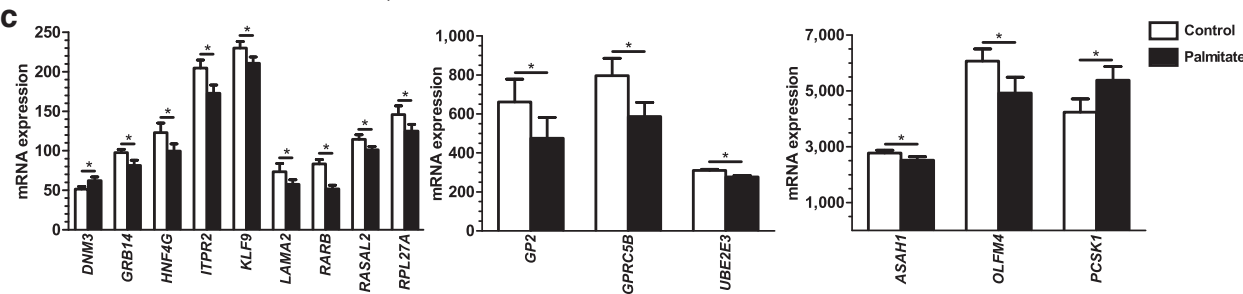

Supplement: MOESM21 [file 9598756]
